# Supplementary material for: A highly stable full-polymer electrochemical deionization system: dopant engineering & mechanism study
Source: Royal Society of Chemistry journal article supplement (doi:10.1039/d4mh00494a), 2024-01-01
Supplement: d4mh00494a1.pdf [file d4mh00494a1.pdf]

## Supporting Information

# Highly Stable Full-Polymer Electrochemical Deionization System: Dopant Engineering & Mechanism Study

**Yi-Heng Tu<sup>a,b</sup>, Hung-Yi Huang<sup>a</sup>, Yu-Hsiang Yang<sup>a</sup>, Louis C. P. M. de**

**Smet<sup>\*,b</sup>, Chi-Chang Hu<sup>\*,a</sup>**

<sup>a</sup>Department of Chemical Engineering  
National Tsing Hua University  
Hsin-Chu 300044, Taiwan

<sup>b</sup>Advanced Interfaces & Materials  
Laboratory of Organic Chemistry  
Wageningen University  
Stippeneng 4, Wageningen 6708 WE, the Netherlands

This supporting information consists of 16 pages, including 10 figures and 4 tables.

### *Section 1. Procedure for preparing titanium current collectors:*

The titanium sheets, from Raysen Titanium Industry Co. (Taiwan), with geometric size of 7 cm × 1 cm were immersed in a beaker containing 6 M HCl. The beaker was heated to 80°C and kept at this temperature for 30 min. Afterward, the pickled sheets were thoroughly rinsed with deionized water to remove any surface grease, followed by ultrasonic agitation for comprehensive cleaning. The titanium sheets were immersed in the RuO<sub>2</sub> solution (0.3 mg/mL in DI water) and dried in an oven at 80°C for three repetitions. The pretreated titanium sheets were annealed at 250°C for 2.5 h, resulting in a thin layer of RuO<sub>2</sub> forming on the substrate. The RuO<sub>2</sub> layer simultaneously acts as a protective layer against substrate oxidation and improves the coating uniformity of PPy, which provides no ion removal capacity.

### *Experimental Setup*

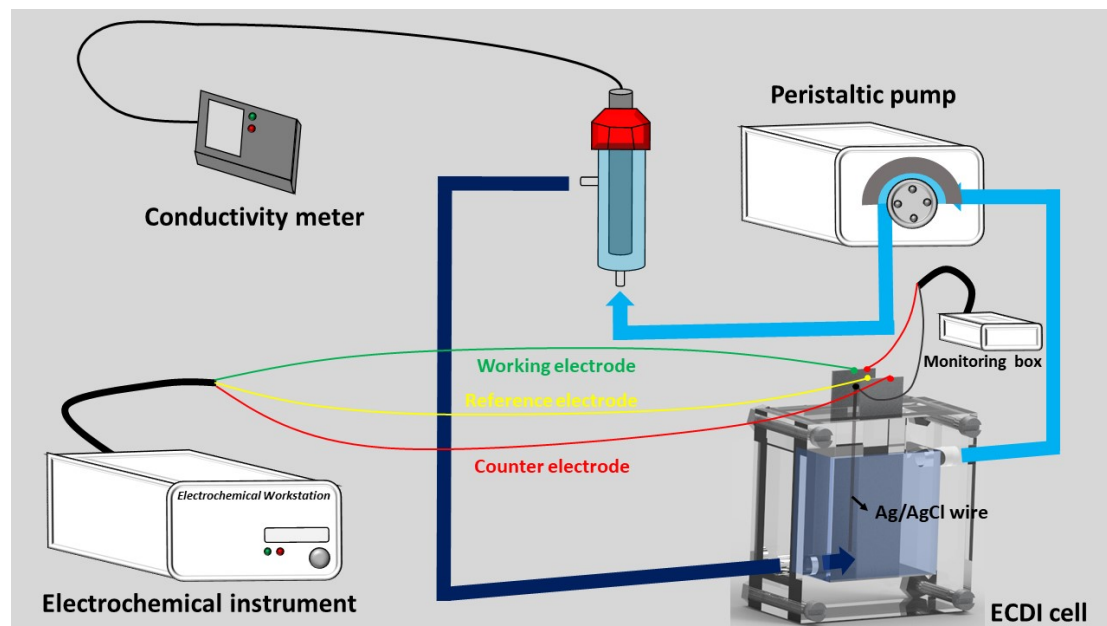

**Figure S1.** The setup of the desalination test.

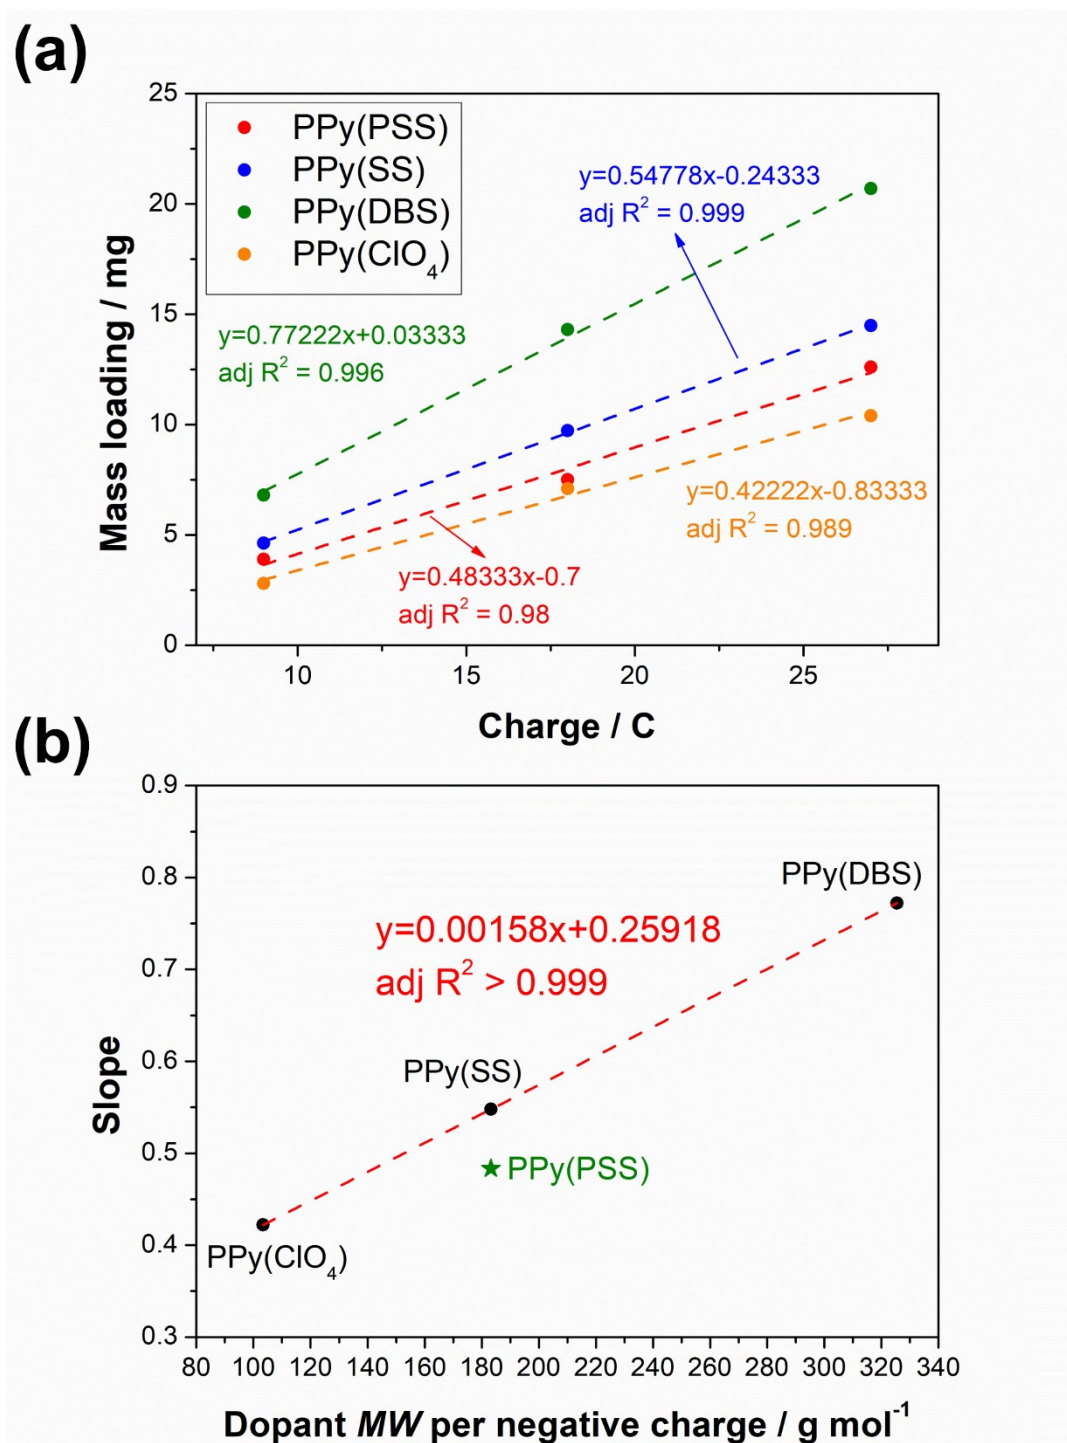

**Figure S2.** (a) Calibration curves of mass loading vs. charge, (b) relation between slope in Figure S2(a) and molecular weight of dopant per negative charge for PPy(PSS), PPy(SS), PPy(PSS), and PPy(ClO<sub>4</sub>).

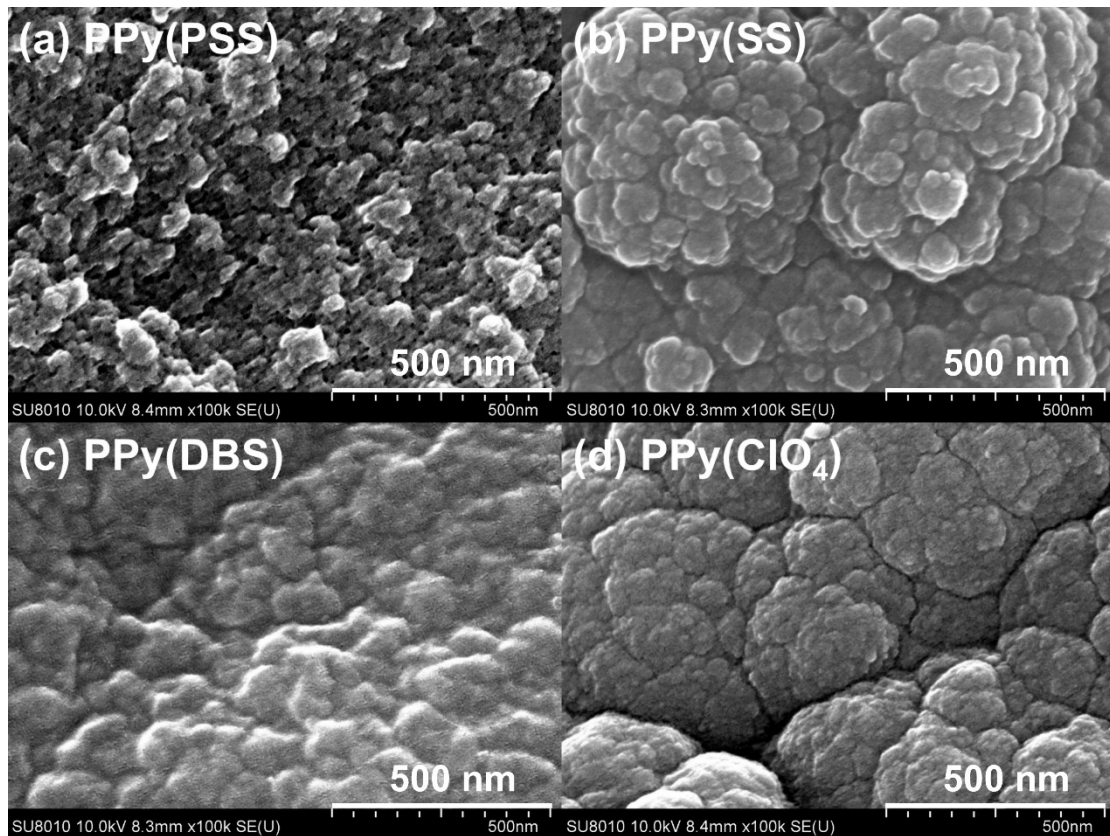

**Figure S3.** SEM photographs revealing the surface morphologies of (a) PPy(PSS), (b) PPy(SS), (c) PPy(DBS), and (d) PPy(ClO<sub>4</sub>) under 100k magnification.

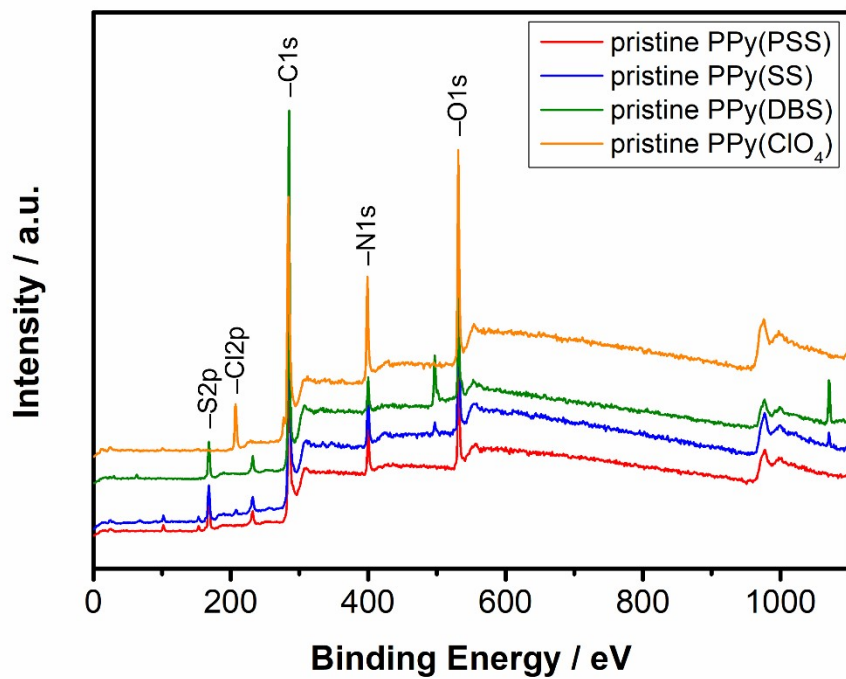

**Figure S4.** XPS element survey spectra of pristine PPy(PSS), PPy(SS), PPy(DBS), and PPy(ClO<sub>4</sub>).

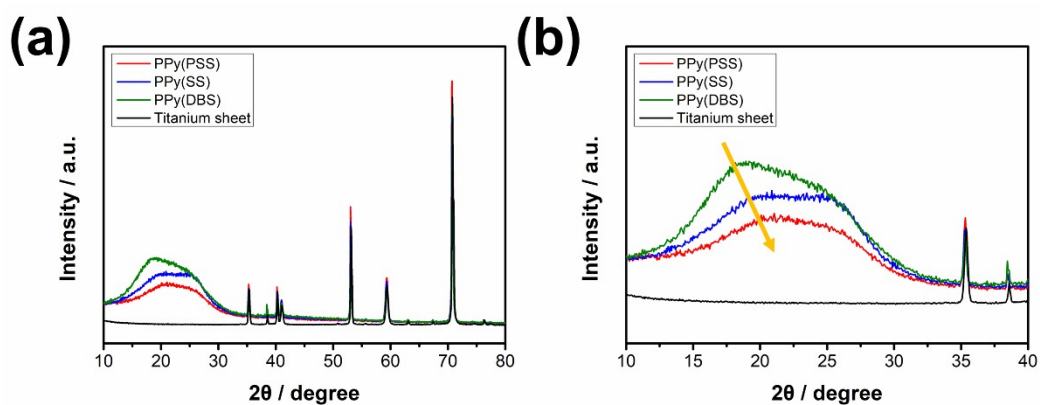

**Figure S5.** XRD analysis of Ti sheet, pristine PPy(PSS), PPy(SS), and PPy(DBS). (a) Full patterns and (b) patterns with  $2\theta$  from 10 to 40°.

Figure S5 shows the typical XRD patterns of various PPy films on the titanium substrates after synthesis. The black line indicates the XRD pattern of a titanium substrate, which most of the peak scatters between 35° to 80°. The responses of the PPy film can be mainly observed between 10° to 30° ( $2\theta$ ). However, due to the poor crystalline structure of PPy, the peaks display in a wide shape.

**Table S1.** Specific capacitance of PPy(PSS), PPy(SS), PPy(DBS), and PPy(ClO<sub>4</sub>) in 10 mM NaCl solution with a potential window of -1.2 V~0.8 V (vs. Ag/AgCl) at a scan rate of 2 mV·s<sup>-1</sup>.

| (F/g)                          | PPy(PSS) | PPy(SS) | PPy(DBS) | PPy(ClO <sub>4</sub> ) |
|--------------------------------|----------|---------|----------|------------------------|
| Specific capacitance ( $C_p$ ) | 91.4     | 52.2    | 28.8     | 62.2                   |

The specific capacitance ( $C_p$ ) was calculated through the following equation:

$$C_p = \frac{A}{2mk\Delta V} \quad (S1)$$

where  $A$  is the area of the CV curve within a certain potential window,  $m$  indicates the mass of the electro-active material,  $k$  represents the scan rate, and  $\Delta V$  is the potential window, which is 2 V (-1.2 V~0.8 V) in this case.

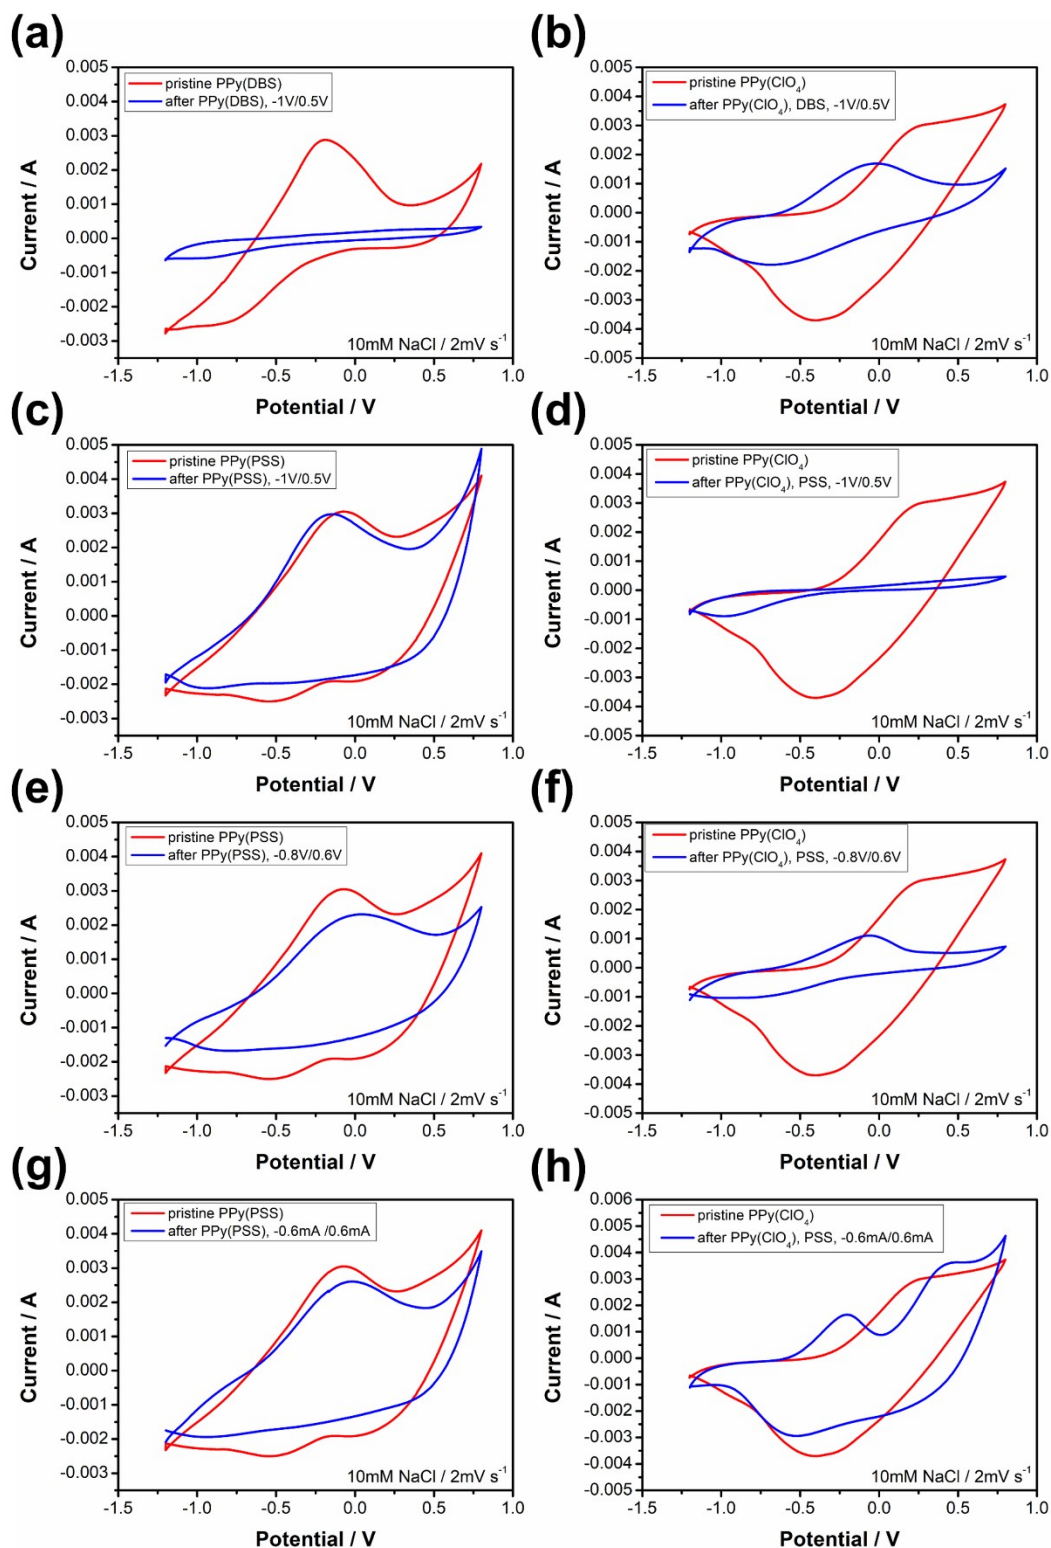

**Figure S6.** Cyclic voltammograms (CVs) of (a) PPy(DBS), (b, d, f, h) PPy(ClO<sub>4</sub>), and (c, e, g) PPy(PSS) before (red) and after (blue) cycling. The PPy(DBS)//PPy(ClO<sub>4</sub>) and PPy(PSS)//PPy(ClO<sub>4</sub>) cells were cycled with (a-d)  $-1\text{ V}/0.5\text{ V}$ , 20 min/20 min and (e, f)  $-0.8\text{ V}/0.6\text{ V}$ , 20 min/20 min, and (g, h)  $-0.6\text{ mA}/0.6\text{ mA}$ , 20 min/20 min.



**Table S2.** Detailed values in **Figure 4**.

|                                   | Method                | Time (min)             | Q-/Q+ at cy10                                     | SRC (mg·g <sup>-1</sup> )                                    | Total SRC 100cy (mg·g <sup>-1</sup> ) |
|-----------------------------------|-----------------------|------------------------|---------------------------------------------------|--------------------------------------------------------------|---------------------------------------|
| PPy(DBS)// PPy(ClO <sub>4</sub> ) | -1V/ 0.5V             | 20/20                  | 1.21                                              | 36.4 ± 0.1                                                   | 2150.35                               |
| PPy(PSS)// PPy(ClO <sub>4</sub> ) | -1V/ 0.5V             | 20/20                  | 1.16                                              | 42.9 ± 0.3                                                   | 2174.81                               |
| PPy(PSS)// PPy(ClO <sub>4</sub> ) | -0.8V/ 0.6V           | 20/20                  | 0.98                                              | 49.7 ± 0.1                                                   | 3692.1                                |
| PPy(PSS)// PPy(ClO <sub>4</sub> ) | -0.6mA/ 0.6mA         | 20/20                  | 1                                                 | 48.1 ± 0.1                                                   | 4311.12                               |
| Continue                          | SRC retention at 40cy | SRC retention at 100cy | Lowest EC (kWh·kg <sup>-1</sup> <sub>NaCl</sub> ) | Avg. EC <sup>+</sup> (kWh·kg <sup>-1</sup> <sub>NaCl</sub> ) |                                       |
| PPy(DBS)// PPy(ClO <sub>4</sub> ) | 72.3%                 | 11.5%                  | 0.438 ± 0.01                                      | 0.576                                                        |                                       |
| PPy(PSS)// PPy(ClO <sub>4</sub> ) | 70.8%                 | 5%                     | 0.609 ± 0.05                                      | 0.817                                                        |                                       |
| PPy(PSS)// PPy(ClO <sub>4</sub> ) | 99.2%                 | 31.2%                  | 0.429 ± 0.00                                      | 0.495                                                        |                                       |
| PPy(PSS)// PPy(ClO <sub>4</sub> ) | 95.2%                 | 89% (96%*)             | 0.167 ± 0.00                                      | 0.194                                                        |                                       |

\*After removing the bubbles in the system.

<sup>+</sup> Average energy consumption was calculated with the following equation:

$$\frac{\text{Total energy consumed in 100 cycles}}{\text{Total salt being removed in 100 cycles}}$$

**Table S3.** Specific capacitance ( $C_P$ ) in **Figure. S6** measured in 10 mM NaCl with a potential window of  $-1.2$  V~ $0.8$  V (vs. Ag/AgCl) at a scan rate of  $2$  mV·s $^{-1}$

| $C_P$              | F/g            | (a) (b) | (c) (d) | (e) (f) | (g) (h) |
|--------------------|----------------|---------|---------|---------|---------|
| Positive electrode | Pristine       | 28.8    | 91.4    | 91.4    | 91.4    |
|                    | After          | 4.5     | 91      | 68.3    | 75.6    |
|                    | Differenc<br>e | -84%    | -0.5%   | -25.2%  | -17%    |
| Negative electrode | Pristine       | 62.2    | 62.2    | 62.2    | 62.2    |
|                    | After          | 35      | 6.6     | 18.5    | 65.6    |
|                    | Differenc<br>e | -43%    | -89%    | -70.2%  | +3%     |

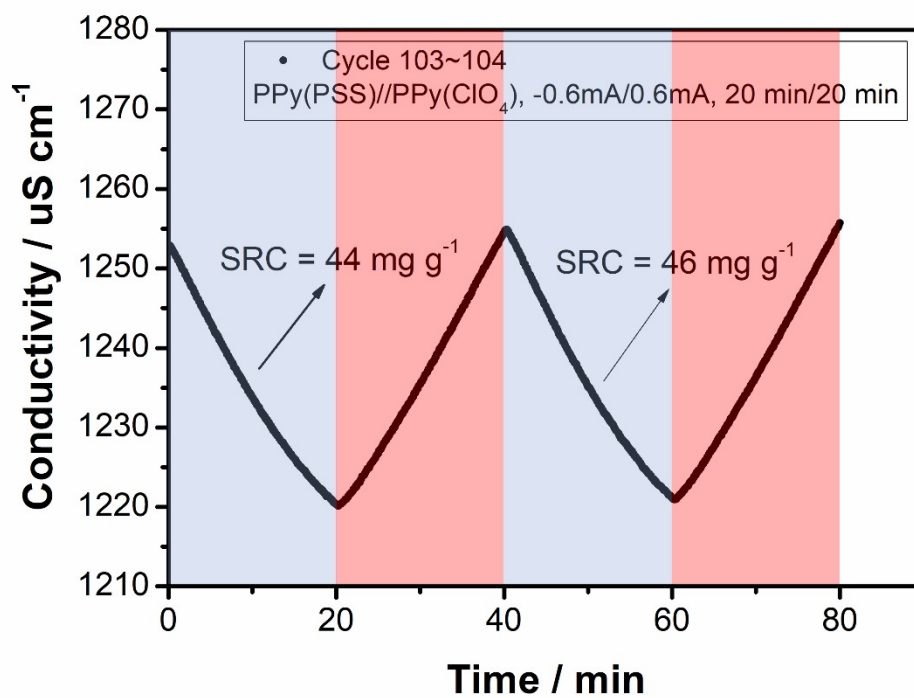

**Figure S7.** Conductivity-time profiles of the 103<sup>rd</sup> and 104<sup>th</sup> cycles for PPy(PSS)//PPy(ClO<sub>4</sub>) with deionization/ concentration = -0.6 mA/ 0.6 mA, 20 min/ 20 min.

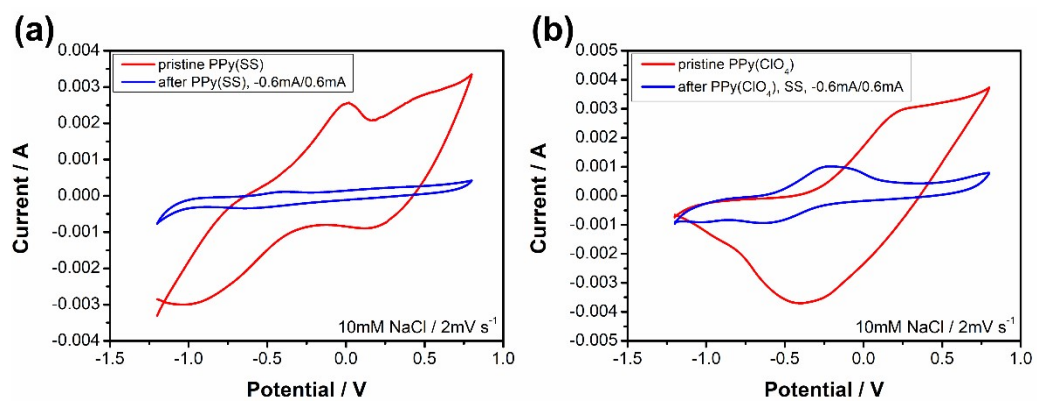

**Figure S8.** Cyclic voltammograms (CVs) of (a) PPy(SS) and (b) PPy(ClO<sub>4</sub>) (1) before and (2) after the PPy(SS)//PPy(ClO<sub>4</sub>) cell was cycled with  $-0.6\text{ mA}/0.6\text{ mA}$ , 20 min/20 min.

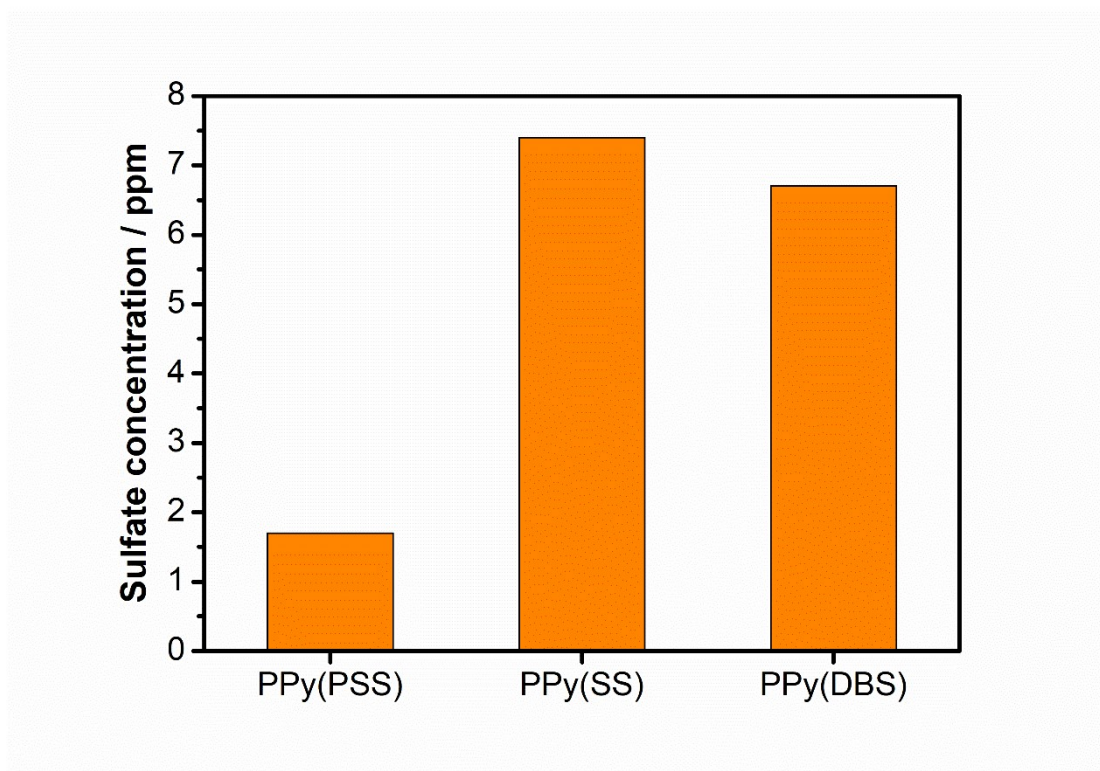

**Figure S9.** The sulfate concentrations in the 10 mM NaCl solution which was subjected to the 100-cycle test with PPy(PSS), PPy(SS), and PPy(DBS).

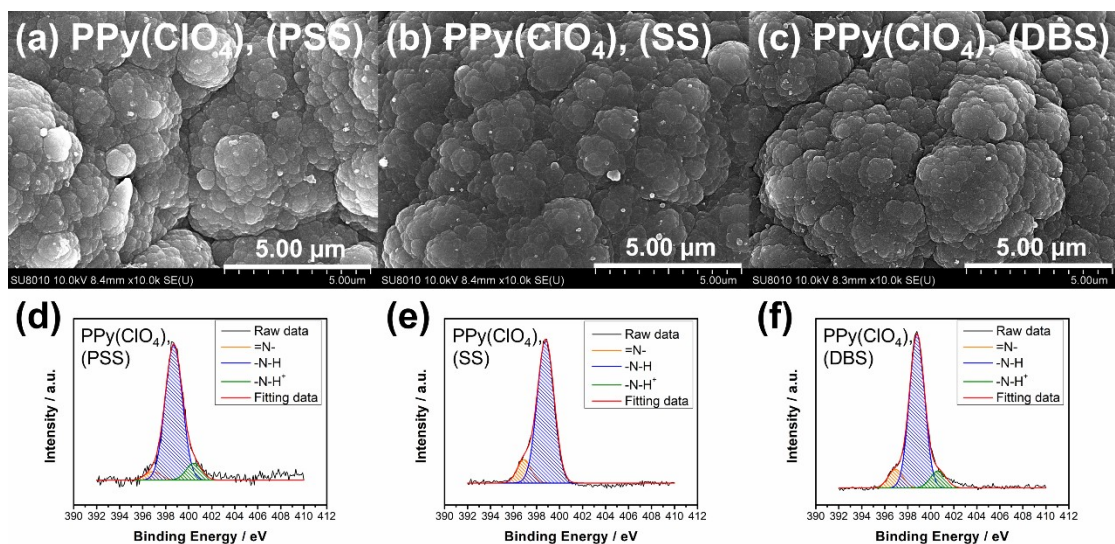

**Figure S10.** SEM surface morphologies under 10k magnification for (a) PPy(ClO<sub>4</sub>) (with PPy(PSS)), (b) PPy(ClO<sub>4</sub>) (with PPy(SS)), and (c) PPy(ClO<sub>4</sub>) (with PPy(DBS)) after the cycling test. HRXPS N1s core level spectra for (d) PPy(ClO<sub>4</sub>) (with PPy(PSS)), (e) PPy(ClO<sub>4</sub>) (with PPy(SS)), and (f) PPy(ClO<sub>4</sub>) (with PPy(DBS)).

**Table S4.** Comparisons of SRC, EC, membrane, cycle life, and retention between this work and various recently proposed conducting polymer-based or conducting polymer-derived systems.

| Electrode Materials                                                                                         | SRC (mg·g <sup>-1</sup> ) | EC (kWh·kg <sup>-1</sup> <sub>NaCl</sub> ) | Mem | Cycle | Retention | Ref       |
|-------------------------------------------------------------------------------------------------------------|---------------------------|--------------------------------------------|-----|-------|-----------|-----------|
| AC//Ni,Co-PBA@MXene/PPy                                                                                     | 29                        | 0.283                                      | X   | 40    | 90%       | 1         |
| PPy-Cl@MXene //PPy-DBS@MXene                                                                                | 35                        | 0.621                                      | X   | 40    | 97%       | 2         |
| AC//MXene/BC@PPy (MBP)                                                                                      | 17.6                      | 0.57                                       | X   | 30    | 95%       | 3         |
| PPy//AC-MnO <sub>2</sub>                                                                                    | 43.2                      | 0.35                                       | X   | 50    | 80%       | 4         |
| CuHCF@PVA/PPy//AC                                                                                           | 45                        | 0.49                                       | O   | 100   | 90%       | 5         |
| PPy-DBS//PPy-ClO <sub>4</sub>                                                                               | 61.7                      | 0.22                                       | X   | 50    | 83%       | 6         |
| AC//PPP                                                                                                     | 45                        | 0.78                                       | O   | 40    | 76%       | 7         |
| S-Ti <sub>3</sub> C <sub>2</sub> T <sub>x</sub> /PANI/F-Ti <sub>3</sub> C <sub>2</sub> T <sub>x</sub> // AC | 76                        | 0.35                                       | X   | 30    | 100%      | 8         |
| H-NP@PANI//AC                                                                                               | 36.9                      | 0.23                                       | X   | 50    | 96%       | 9         |
| PPy(PSS)//PPy(ClO <sub>4</sub> )                                                                            | 48.1±0.1                  | 0.123 ± 0.00                               | X   | 104   | 96%       | This work |

Note: Mem = Membranes

## References

1. Y. Cai, W. Zhang, J. Zhao and Y. Wang, *Applied Surface Science*, 2023, **622**, 156926.
2. L. Zhang, Y. Cai, R. Fang, Y. Wang and S. Xu, *Separation and Purification Technology*, 2024, **337**, 126362.
3. W. Xu, C. Tan, A. Wang, S. Hu, L. Deng, S. Boles, K. Sun, B. Li and H. Hu, *ACS Applied Materials & Interfaces*, 2023, **15**, 16266-16276.
4. G. Tan, S. Lu, N. Xu, D. Gao and X. Zhu, *Environmental Science & Technology*, 2020, **54**, 5843-5852.
5. Y. Ren, F. Yu, X.-G. Li, B. Yulianto, X. Xu, Y. Yamauchi and J. Ma, *Materials Horizons*, 2023, **10**, 3548-3558.
6. H.-Y. Huang, Y.-H. Tu, Y.-H. Yang, Y.-A. Chen, W.-L. Lee, M.-F. Wu, H.-H. Chou and C.-C. Hu, *Journal of Materials Chemistry A*, 2024, **12**, 4312-4324.
7. W. Kong, X. Ge, M. Yang, Q. Zhang, J. Lu, H. Wen, H. Wen, D. Kong, M. Zhang and X. Zhu, *Desalination*, 2023, **553**, 116452.
8. X. Yang, Z. Jia, W. Zhang, G. Ying, Z. Wang, Z. Lu and J. Zhang, *Desalination*, 2022, **535**, 115816.
9. J. Guo, Y. Wang, H. Zhang, Y. Cai and R. Fang, *Desalination*, 2023, **548**, 116305.
